# Supplementary material for: Development of a bedside score to predict dengue severity
Source: bioRxiv or medRxiv preprint supplement (doi:10.1101/2020.11.25.20238972), 2020-11-30
Supplement: Supplementary file [file media-1.pdf]

## Supporting information

S1 Fig.

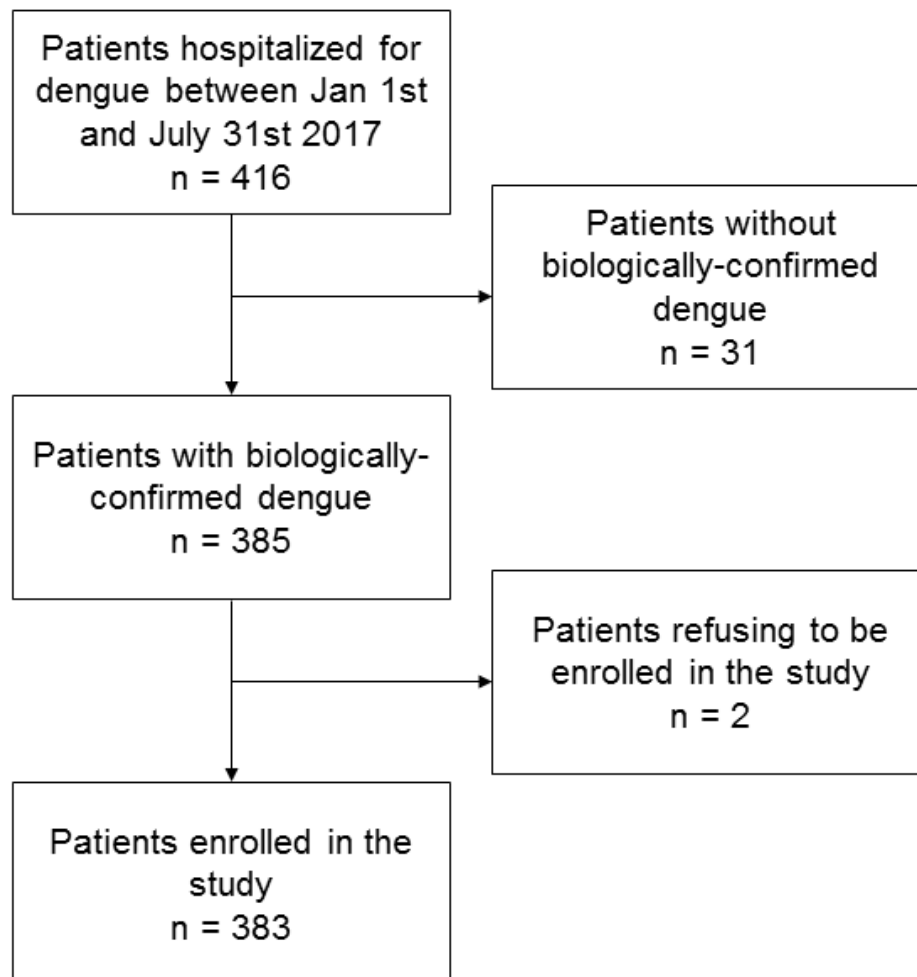

S2 Fig.

| Model for females       |                               | If characteristic present, write 1 in the corresponding cell | Score |
|-------------------------|-------------------------------|--------------------------------------------------------------|-------|
| Age class (years)       | >60                           |                                                              |       |
|                         | ]40-60]                       |                                                              |       |
|                         | ]30-40]                       |                                                              |       |
|                         | ]20-30]                       |                                                              |       |
|                         | ]10-20]                       |                                                              |       |
|                         | <=10                          |                                                              |       |
| Medical history         | Hypertension (treated or not) |                                                              |       |
| Symptoms                | Mucosal bleeding              |                                                              |       |
|                         | Clinical liquid accumulation  |                                                              |       |
|                         | Skin rash (except purpura)    |                                                              |       |
| Last biological results | Platelets <30 G/L             |                                                              |       |
|                         | ALT>10N                       |                                                              |       |
| Model for males         |                               |                                                              |       |
| Age class (years)       | >60                           |                                                              | 0,04  |
|                         | ]40-60]                       |                                                              |       |
|                         | ]30-40]                       |                                                              |       |
|                         | ]20-30]                       |                                                              |       |
|                         | ]10-20]                       |                                                              |       |
|                         | <=10                          |                                                              |       |
| Risky behavior          | Alcohol abuse >3 units/day    |                                                              |       |
| Symptoms                | Mucosal bleeding              |                                                              |       |
| Last biological results | Platelets <30 G/L             |                                                              |       |
|                         | ALT>10N                       |                                                              |       |

S3 Fig.

♀ 25 years, gynecological bleeding, deep thrombocytopenia and liver cytolysis >10N  
=> hospital admission decision

| Model for females       |                               | Enter 1, if the item is present |  |                                                                                                       |      |
|-------------------------|-------------------------------|---------------------------------|--|-------------------------------------------------------------------------------------------------------|------|
| Age class (years)       | >60                           |                                 |  | Score                                                                                                 |      |
|                         | 40-60                         |                                 |  |                                                                                                       | 0,94 |
|                         | 30-40                         |                                 |  |                                                                                                       |      |
|                         | 20-30                         | 1                               |  |                                                                                                       |      |
|                         | <=20                          |                                 |  |                                                                                                       |      |
| Medical past history    | Hypertension (treated or not) |                                 |  | Interpretation = high probability to develop severe dengue<br>=> admission in the dengue unit +/- iCU |      |
| Symptomes               | Muquous bleeding              | 1                               |  |                                                                                                       |      |
|                         | Clinical liquid accumulation  |                                 |  |                                                                                                       |      |
|                         | Skin rash (except purpura)    |                                 |  |                                                                                                       |      |
| Last biological results | platelets <30 G/L             | 1                               |  |                                                                                                       |      |
|                         | ALAT>10N                      | 1                               |  |                                                                                                       |      |

Decisional threshold ♀  
≥ 0,36

♂ 50 years, repeted vomiting + dehydration => hospital admission décision

| Model for males         |                            |   |  |                                                                                                                                                                                       |      |
|-------------------------|----------------------------|---|--|---------------------------------------------------------------------------------------------------------------------------------------------------------------------------------------|------|
| Age class (years)       | >60                        |   |  | Score                                                                                                                                                                                 |      |
|                         | 40-60                      | 1 |  |                                                                                                                                                                                       | 0,23 |
|                         | 30-40                      |   |  |                                                                                                                                                                                       |      |
|                         | 20-30                      |   |  |                                                                                                                                                                                       |      |
|                         | <=20                       |   |  |                                                                                                                                                                                       |      |
| Medical past history    | Alcohol abuse >3 units/day |   |  | Interpretation = low probability to develop severe dengue<br>=> admission in a medical unit, possibility of accomodation in surgery or gynecology in case of hospital beds saturation |      |
| Symptomes               | Muquous bleeding           |   |  |                                                                                                                                                                                       |      |
|                         | platelets <30 G/L          | 1 |  |                                                                                                                                                                                       |      |
| Last biological results | ALAT>10N                   |   |  |                                                                                                                                                                                       |      |

Decisional threshold ♂  
≥ 0,34

**S4 Fig.**Females (n=66)

| Classification of the patients \ Result of the model | Severe dengue | Non-severe dengue |
|------------------------------------------------------|---------------|-------------------|
| Severe dengue                                        | 11            | 6                 |
| Non-severe dengue                                    | 4             | 45                |

Males (n=64)

| Classification of the patients \ Result of the model | Severe dengue | Non-severe dengue |
|------------------------------------------------------|---------------|-------------------|
| Severe dengue                                        | 16            | 13                |
| Non-severe dengue                                    | 3             | 32                |
